# Supplementary material for: Synthesis of functional tetrathiafulvalene-terpyridine dyad for metal cation recognition
Source: Royal Society of Chemistry journal article supplement (doi:10.1039/d1nj04106a), 2021-01-01
Supplement: d1nj04106a1.pdf [file d1nj04106a1.pdf]

## Synthesis of functional tetrathiafulvalene-terpyridine dyad for Metal Cation Recognition

Wenhao Zhang,<sup>a</sup> Thomas Blin,<sup>a</sup> Antoine Busseau,<sup>b</sup> Sagrario Pascual,<sup>a</sup> Abdelkrim El-Ghayoury,<sup>b</sup> Stéphanie Legoupy,<sup>\*,b</sup> Sandie Piogé<sup>\*,a</sup>

<sup>a</sup> Institut des Molécules et Matériaux du Mans, IMMM UMR 6283 CNRS – Le Mans Université, Avenue Olivier Messiaen, Le Mans 72085 Cedex 9, France. E-mail: [sandie.pioge@univ-lemans.fr](mailto:sandie.pioge@univ-lemans.fr)

<sup>b</sup> Univ Angers, CNRS, MOLTECH-ANJOU, F-49000 Angers, France. E-mail: [stephanie.legoupy@univ-angers.fr](mailto:stephanie.legoupy@univ-angers.fr)

### Table of contents

|                                                                                                                                                                                                                                                                                                                |    |
|----------------------------------------------------------------------------------------------------------------------------------------------------------------------------------------------------------------------------------------------------------------------------------------------------------------|----|
| Figure S1 : <sup>1</sup> H NMR spectrum in CDCl <sub>3</sub> of <b>3</b>                                                                                                                                                                                                                                       | 2  |
| Figure S2 : <sup>13</sup> C NMR spectrum in CDCl <sub>3</sub> of <b>3</b>                                                                                                                                                                                                                                      | 3  |
| Figure S3 : <sup>1</sup> H NMR spectrum in CDCl <sub>3</sub> of <b>4</b>                                                                                                                                                                                                                                       | 4  |
| Figure S4 : <sup>13</sup> C NMR spectrum in CDCl <sub>3</sub> of <b>4</b>                                                                                                                                                                                                                                      | 5  |
| Figure S5 : <sup>1</sup> H NMR spectrum in CDCl <sub>3</sub> of <b>5</b>                                                                                                                                                                                                                                       | 6  |
| Figure S6 : <sup>13</sup> C NMR spectrum in CDCl <sub>3</sub> of <b>5</b>                                                                                                                                                                                                                                      | 7  |
| Figure S7 : <sup>1</sup> H NMR spectrum in CDCl <sub>3</sub> of <b>6</b>                                                                                                                                                                                                                                       | 8  |
| Figure S8 : <sup>13</sup> C NMR spectrum in CDCl <sub>3</sub> of <b>6</b>                                                                                                                                                                                                                                      | 9  |
| Figure S9 : <sup>1</sup> H NMR spectrum in CDCl <sub>3</sub> of <b>1</b>                                                                                                                                                                                                                                       | 10 |
| Figure S10 : <sup>13</sup> C NMR spectrum in CDCl <sub>3</sub> of <b>1</b>                                                                                                                                                                                                                                     | 11 |
| Figure S11 : UV-Visible experiment of dyad <b>1</b> (10 <sup>-5</sup> M) in CH <sub>2</sub> Cl <sub>2</sub> /CH <sub>3</sub> CN (1/1, v/v)                                                                                                                                                                     | 12 |
| Figure S12 : CV experiment of dyad <b>1</b> (10 <sup>-3</sup> M) in CH <sub>2</sub> Cl <sub>2</sub> /CH <sub>3</sub> CN (1/1, v/v); 100 mV/s, <i>n</i> Bu <sub>4</sub> BF <sub>6</sub> (10 <sup>-1</sup> M), vs Ag/AgCl, (vs Fc/Fc <sup>+</sup> )                                                              | 12 |
| Figure S13 : UV-Visible titration experiment of dyad <b>1</b> (10 <sup>-5</sup> M) in CH <sub>2</sub> Cl <sub>2</sub> /CH <sub>3</sub> CN (1/1, v/v) in presence of Fe(ClO <sub>4</sub> ) <sub>2</sub>                                                                                                         | 13 |
| Figure S14 : Color evolution before (left) and after (right) the titration of dyad <b>1</b> (10 <sup>-5</sup> M) in presence of 2 eq Fe(ClO <sub>4</sub> ) <sub>2</sub> in CH <sub>2</sub> Cl <sub>2</sub> /CH <sub>3</sub> CN (1/1, v/v)                                                                      | 13 |
| Figure S15 : CV titration experiment of dyad <b>1</b> (10 <sup>-3</sup> M) in CH <sub>2</sub> Cl <sub>2</sub> /CH <sub>3</sub> CN (1/1, v/v) in presence of Fe(ClO <sub>4</sub> ) <sub>2</sub> ; 100 mV/s, <i>n</i> Bu <sub>4</sub> BF <sub>6</sub> (10 <sup>-1</sup> M), vs Ag/AgCl, (vs Fc/Fc <sup>+</sup> ) | 13 |
| Figure S16 : Further study of UV-Visible titration of dyad <b>1</b> (10 <sup>-5</sup> M) in CH <sub>2</sub> Cl <sub>2</sub> /CH <sub>3</sub> CN (1/1, v/v) in presence of Pb(ClO <sub>4</sub> ) <sub>2</sub>                                                                                                   | 14 |
| Figure S17 : Further study of UV-Visible titration of dyad <b>1</b> (10 <sup>-5</sup> M) in CH <sub>2</sub> Cl <sub>2</sub> /CH <sub>3</sub> CN (1/1, v/v) in presence of Fe(ClO <sub>4</sub> ) <sub>2</sub>                                                                                                   | 14 |
| Figure S18 : Further study of UV-Visible titration of dyad <b>1</b> (10 <sup>-5</sup> M) in CH <sub>2</sub> Cl <sub>2</sub> /CH <sub>3</sub> CN (1/1, v/v) in presence of Zn(ClO <sub>4</sub> ) <sub>2</sub>                                                                                                   | 14 |

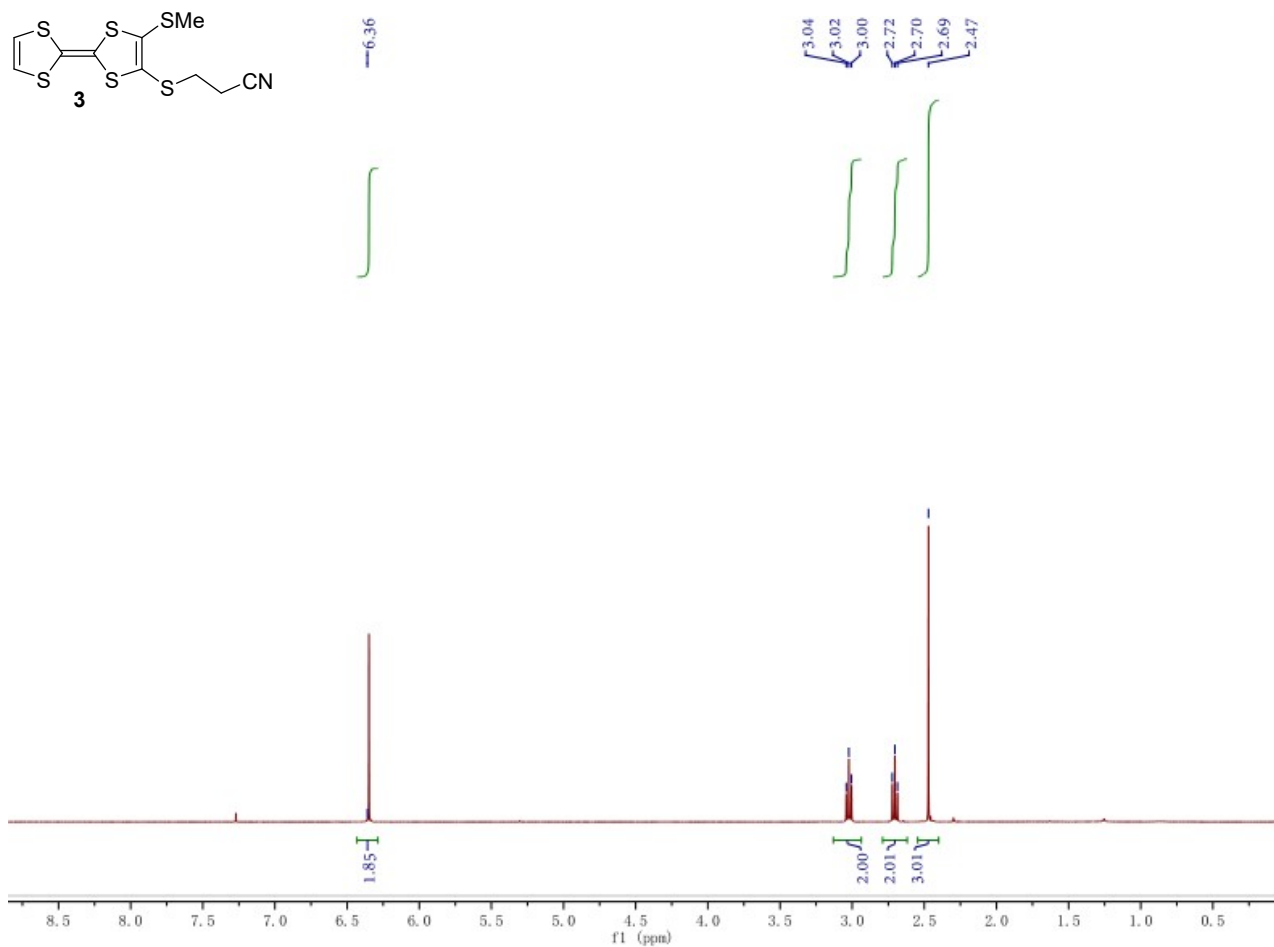

Figure S1 : <sup>1</sup>H NMR spectrum in CDCl<sub>3</sub> of **3**.

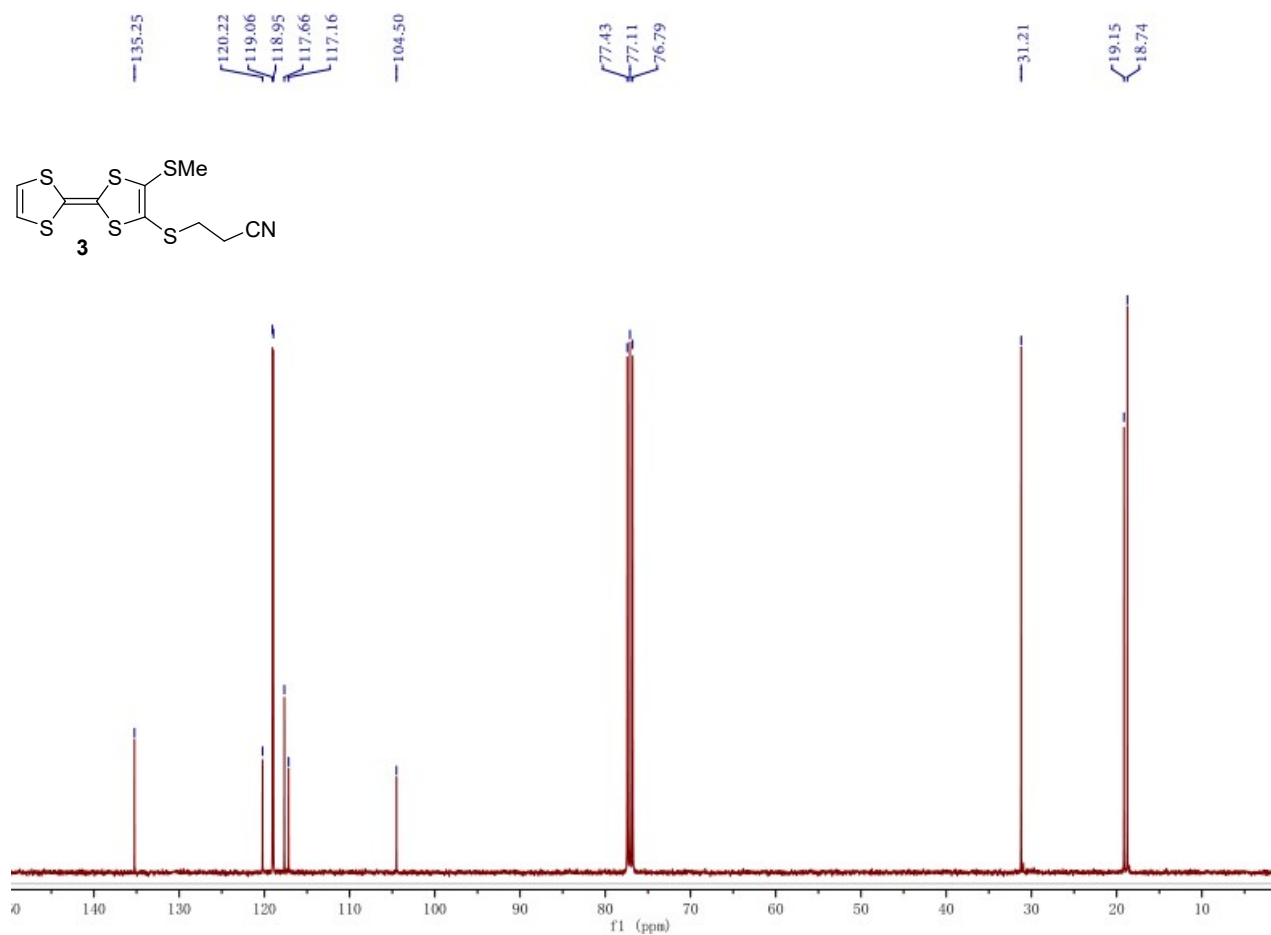

Figure S2 : <sup>13</sup>C NMR spectrum in CDCl<sub>3</sub> of **3**.

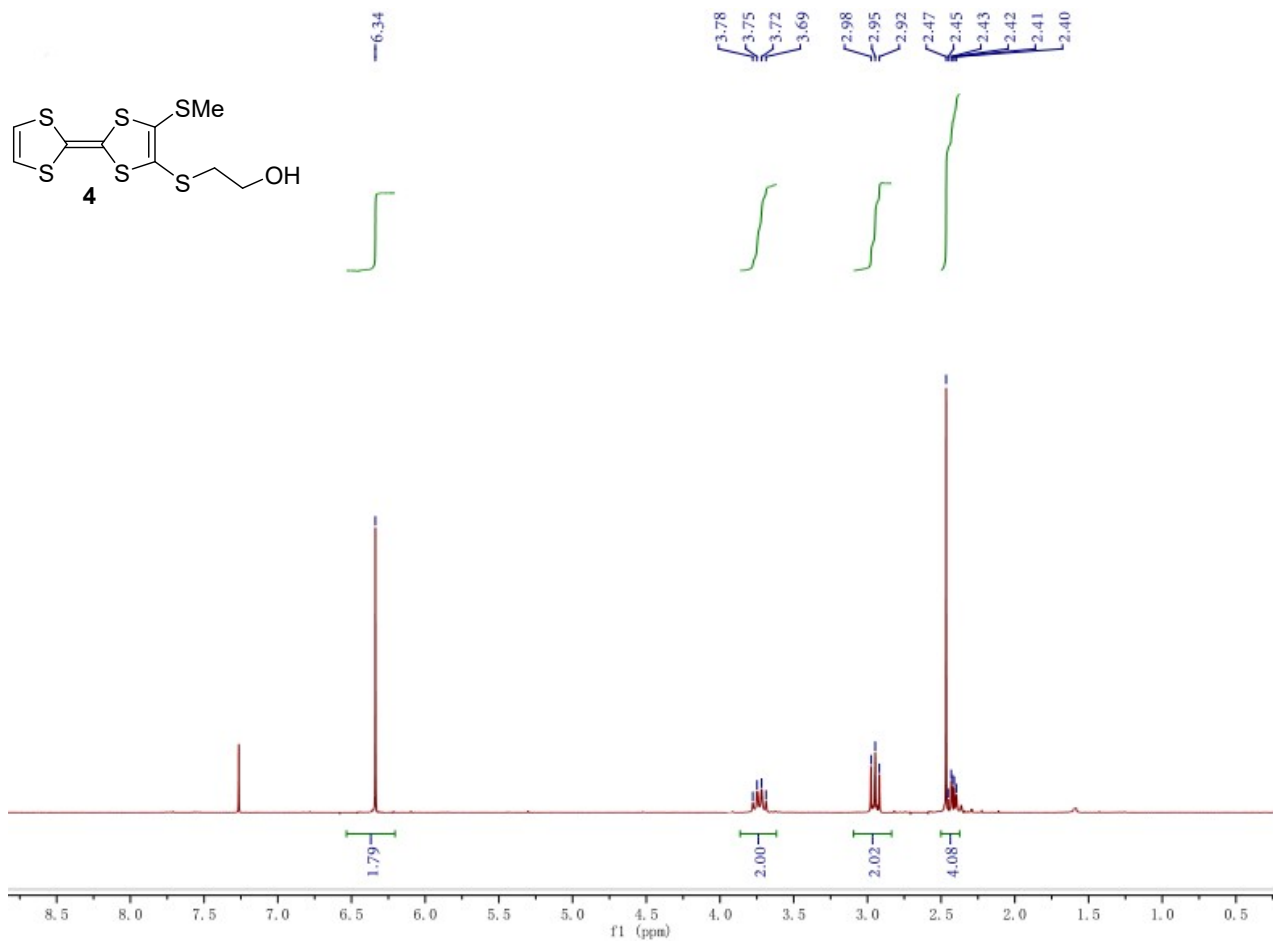

**Figure S3** : <sup>1</sup>H NMR spectrum in CDCl<sub>3</sub> of **4**.

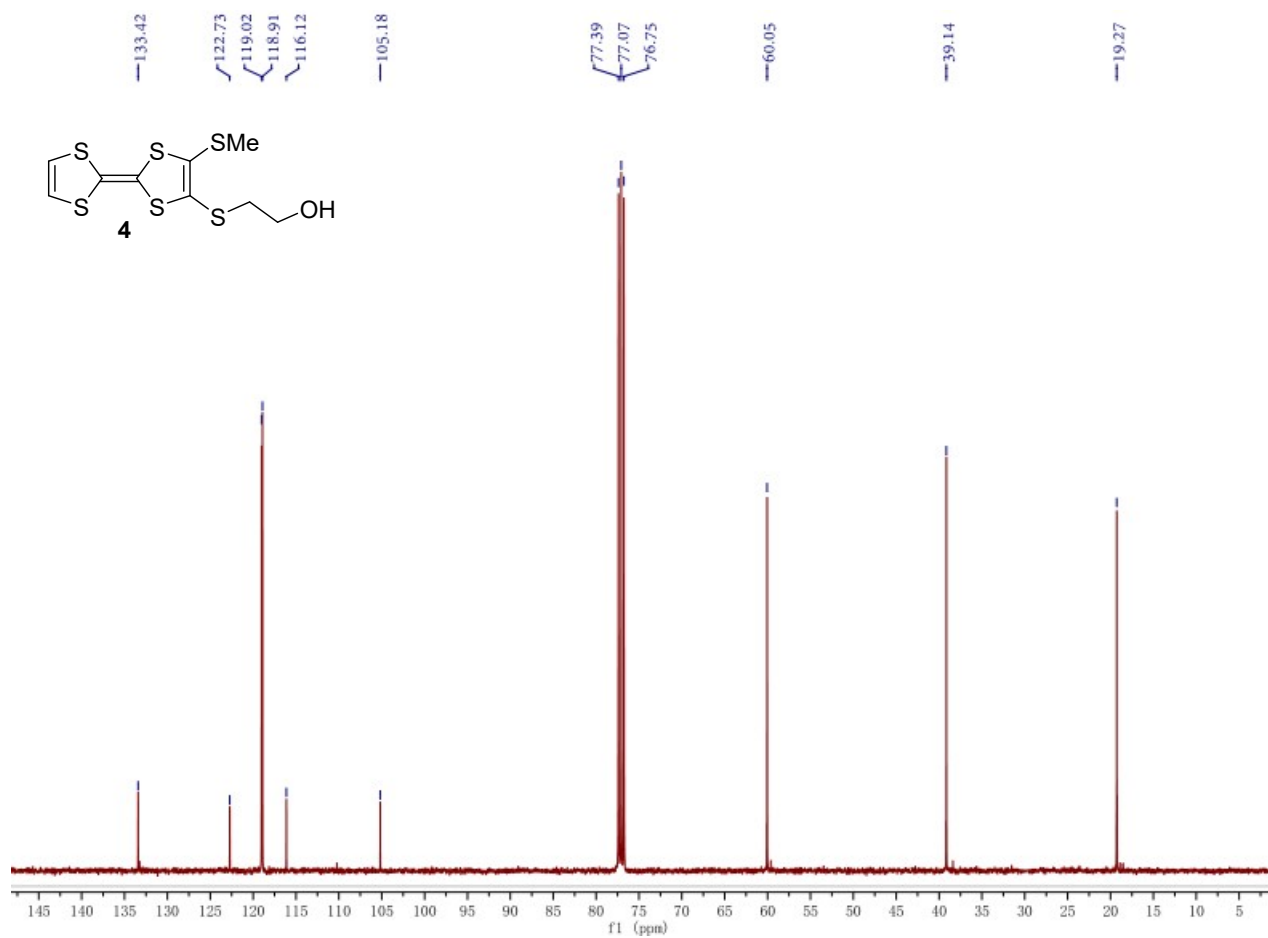

Figure S4 : <sup>13</sup>C NMR spectrum in CDCl<sub>3</sub> of **4**.

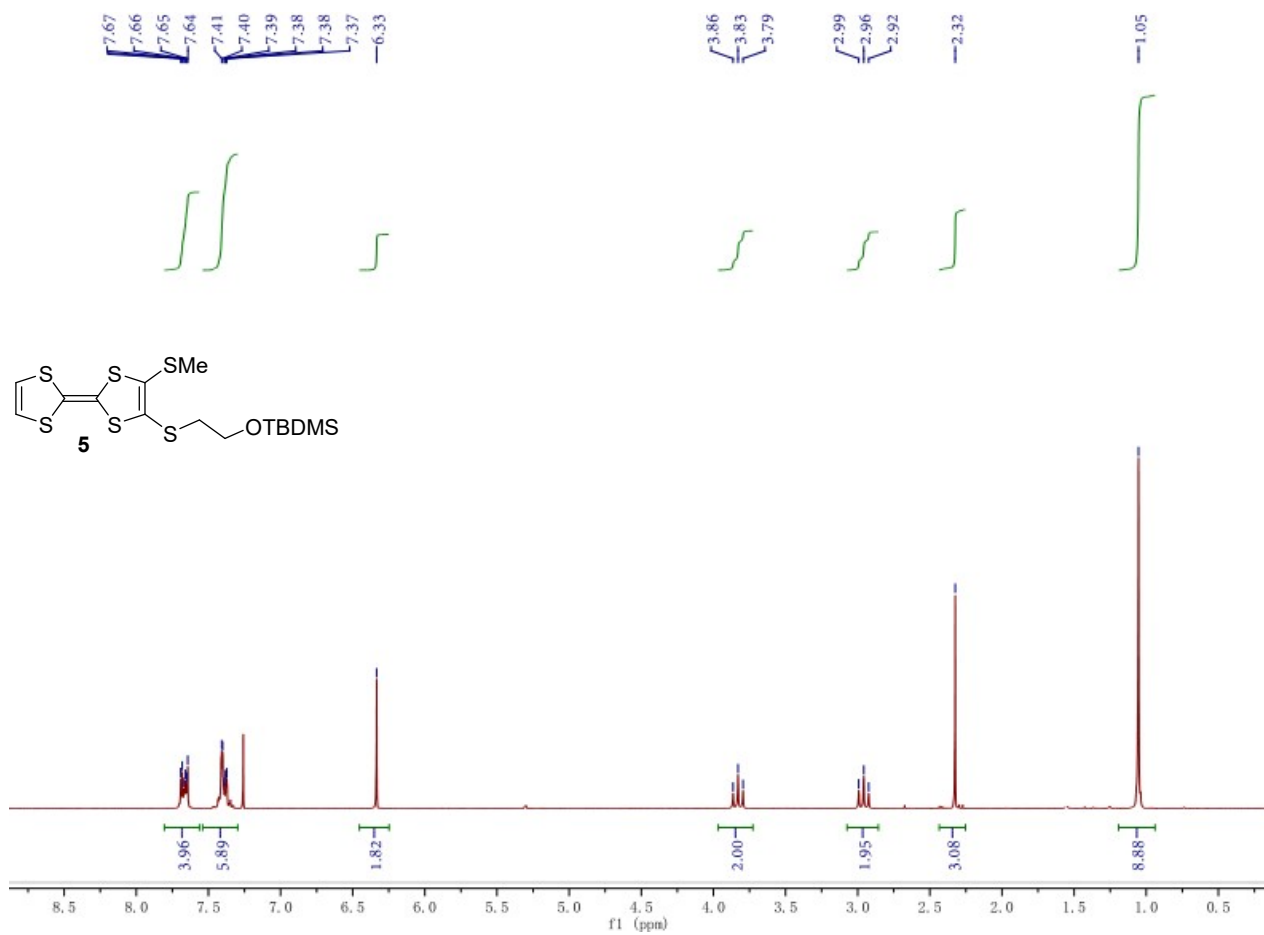

Figure S5 : <sup>1</sup>H NMR spectrum in CDCl<sub>3</sub> of **5**.

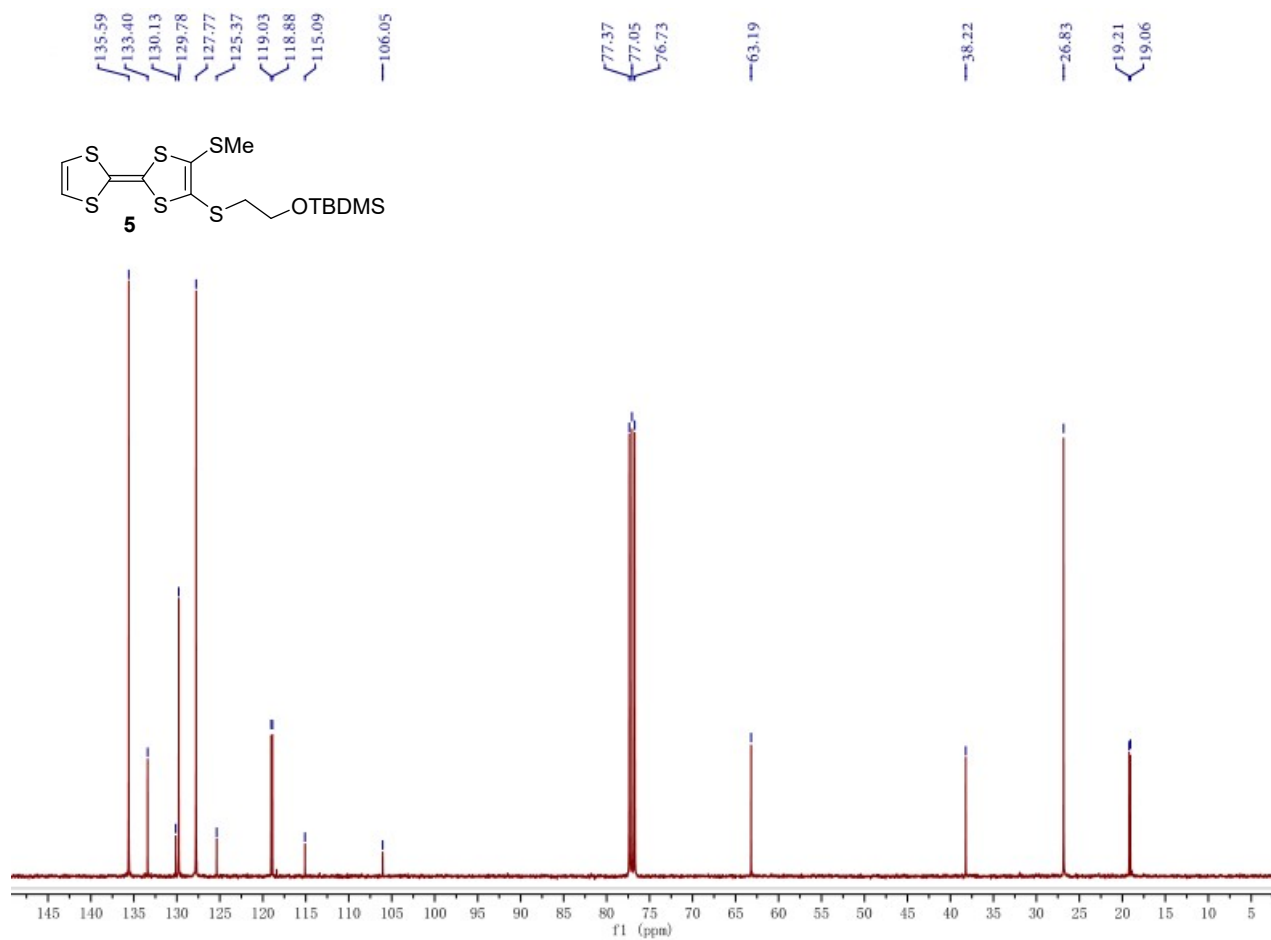

Figure S6 : <sup>13</sup>C NMR spectrum in CDCl<sub>3</sub> of **5**.

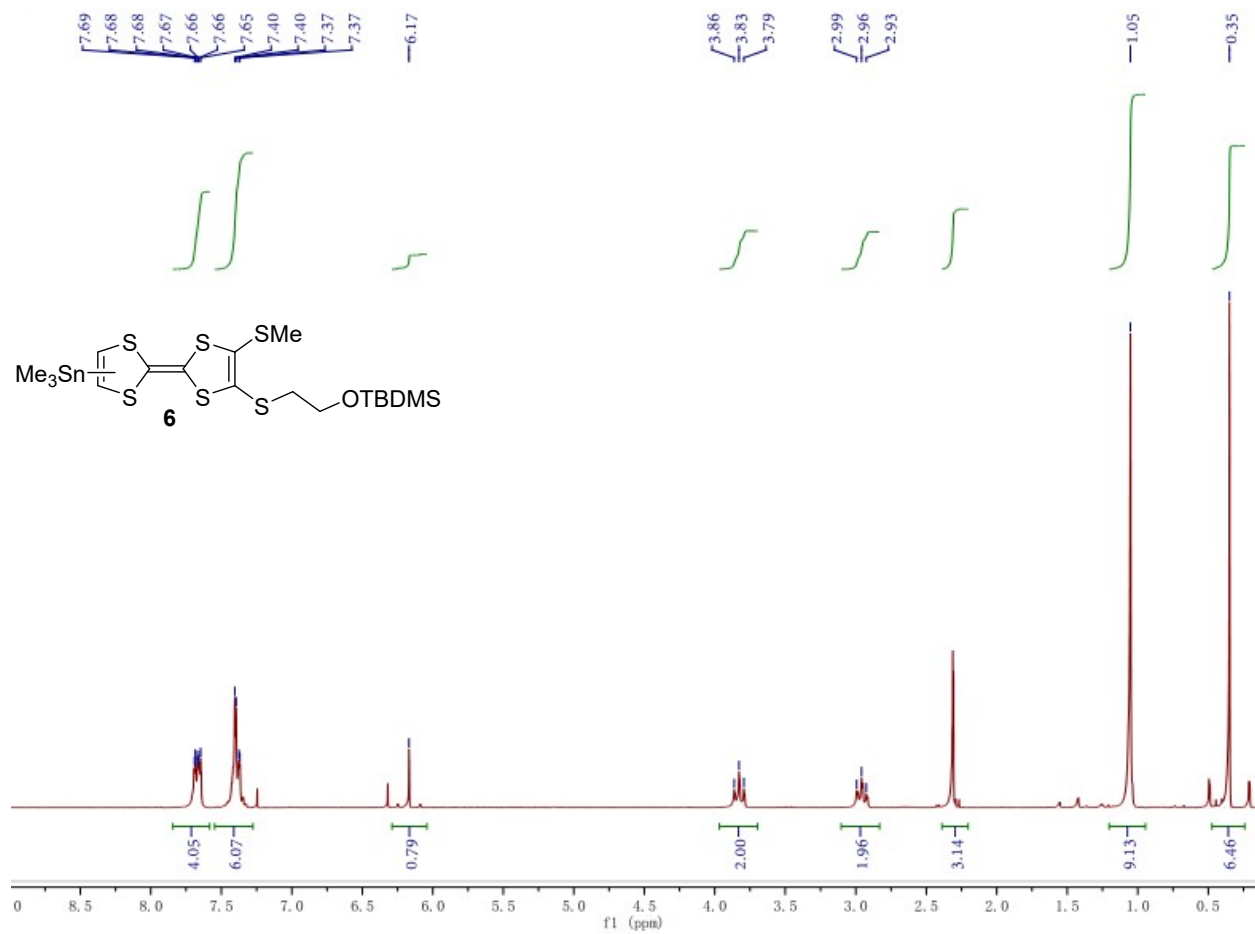

Figure S7 : <sup>1</sup>H NMR spectrum in CDCl<sub>3</sub> of **6**.



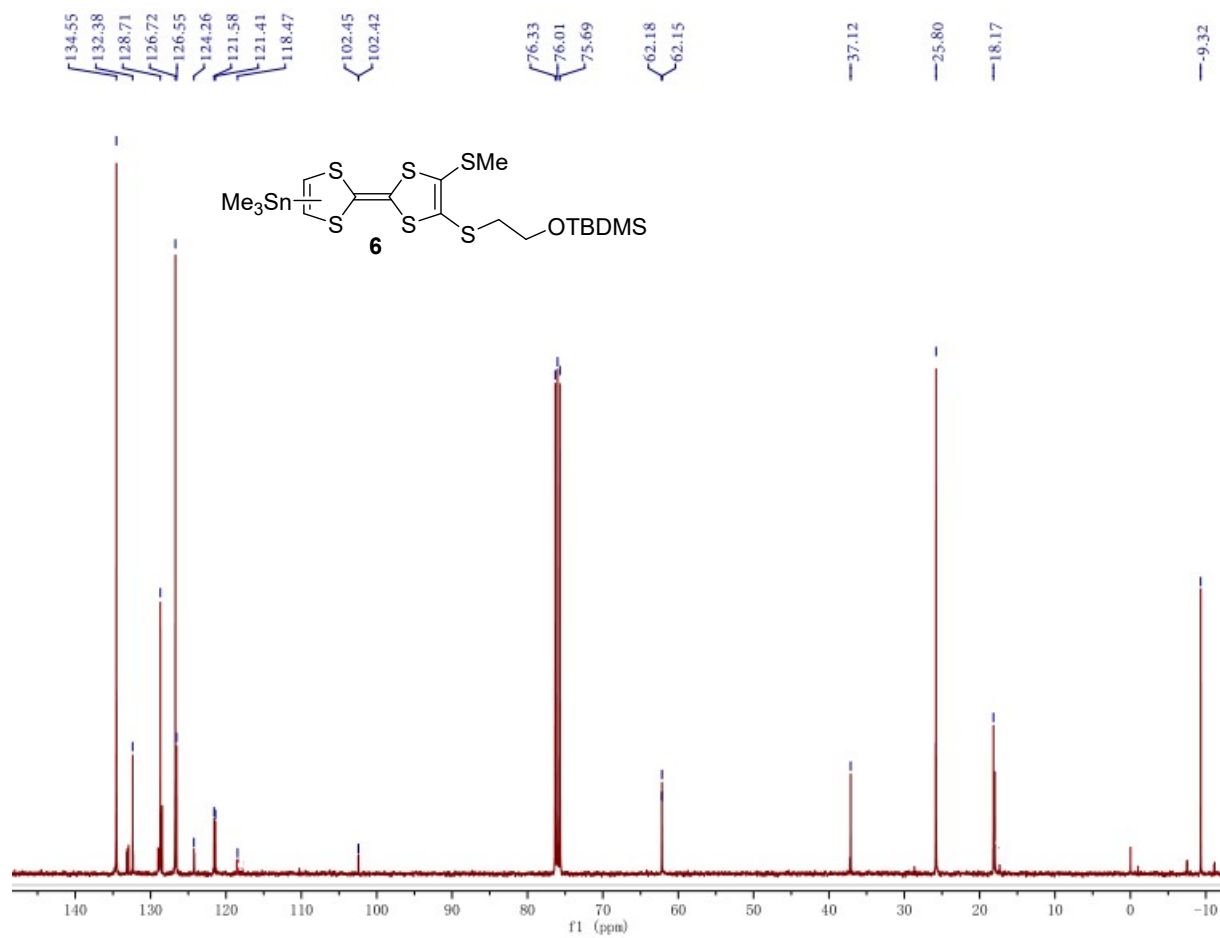

Figure S8 :  $^{13}\text{C}$  NMR spectrum in  $\text{CDCl}_3$  of **6**.

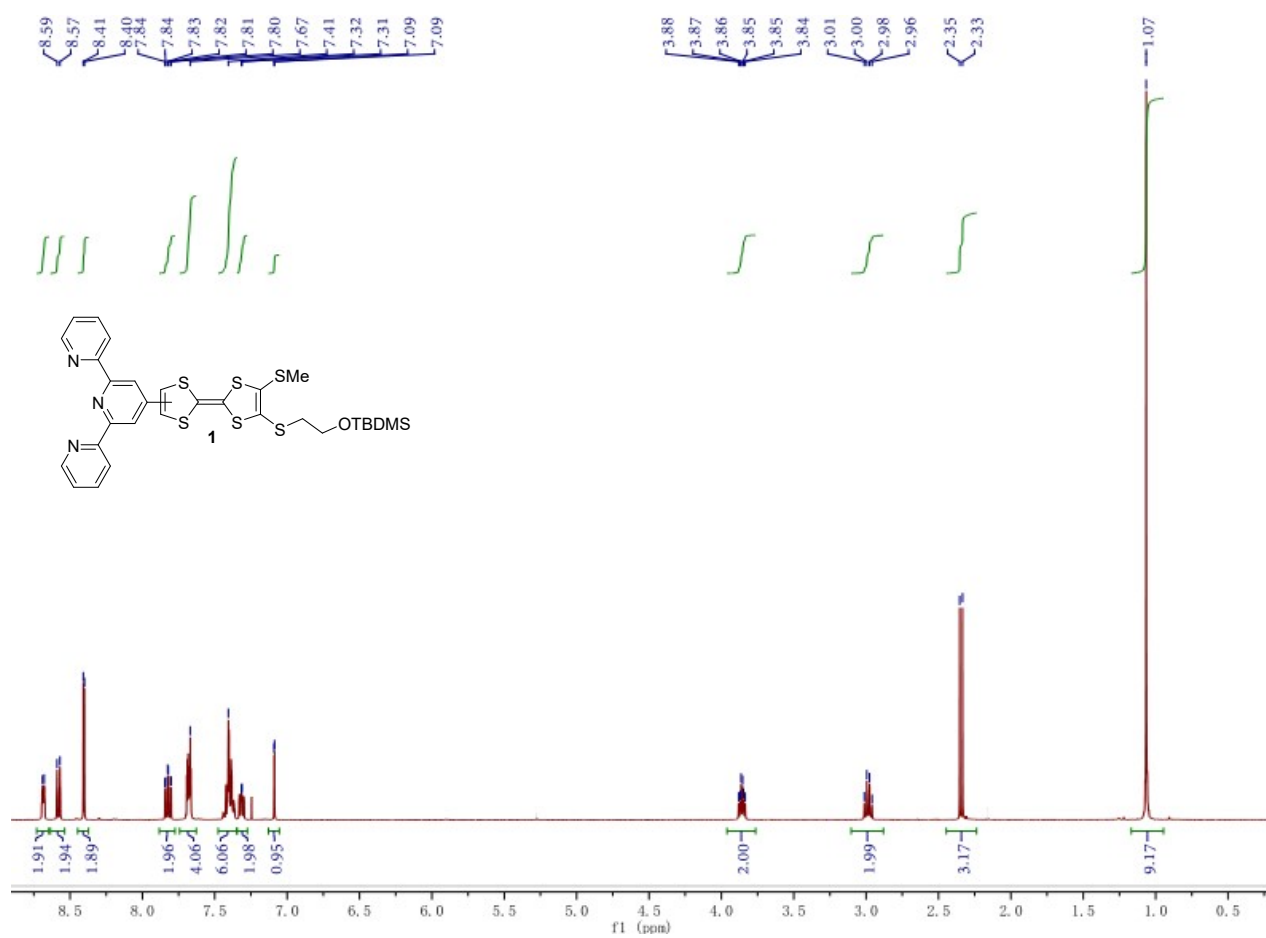

Figure S9 : <sup>1</sup>H NMR spectrum in CDCl<sub>3</sub> of 1.

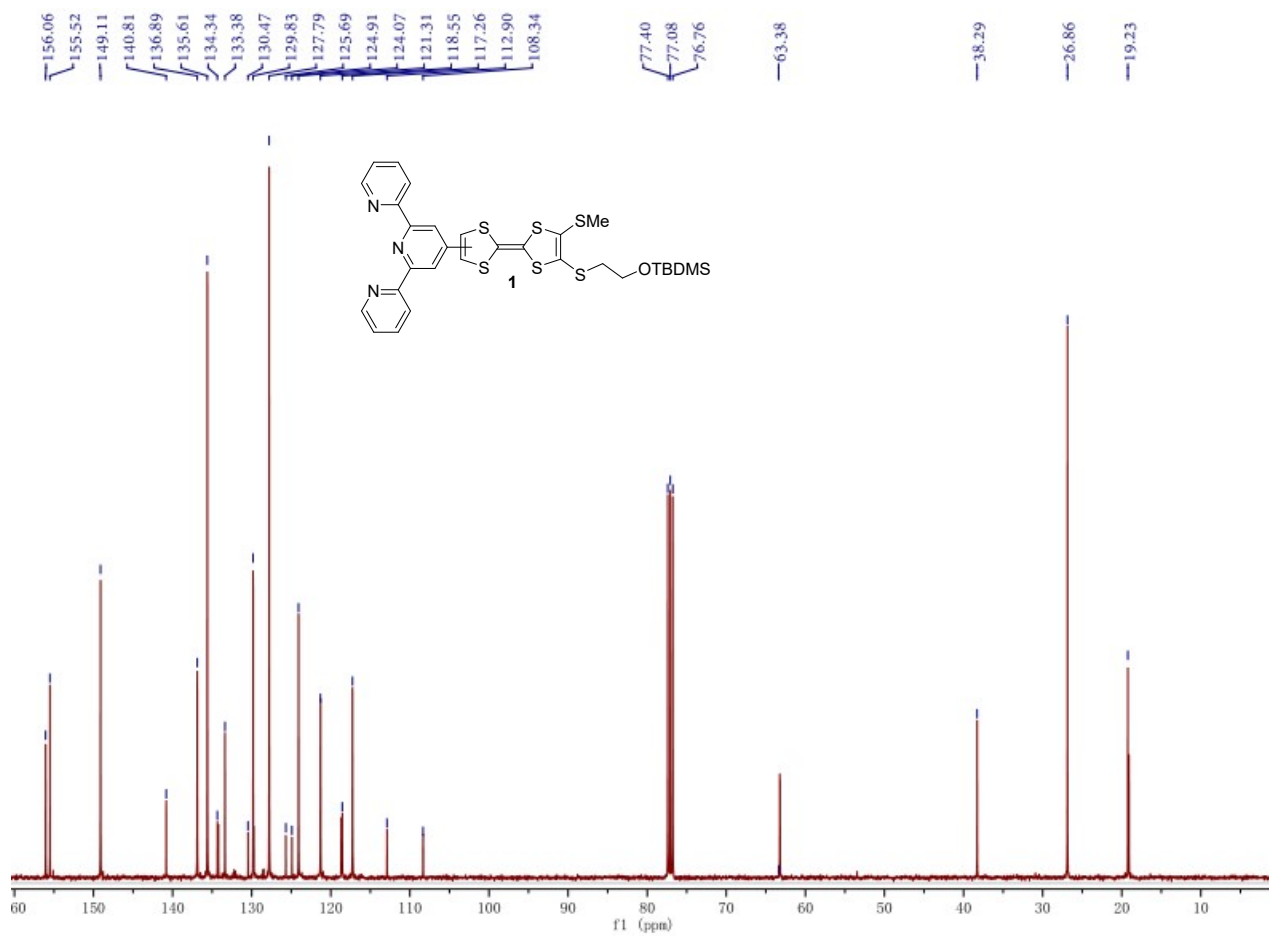

Figure S10 :  $^{13}\text{C}$  NMR spectrum in  $\text{CDCl}_3$  of **1**.

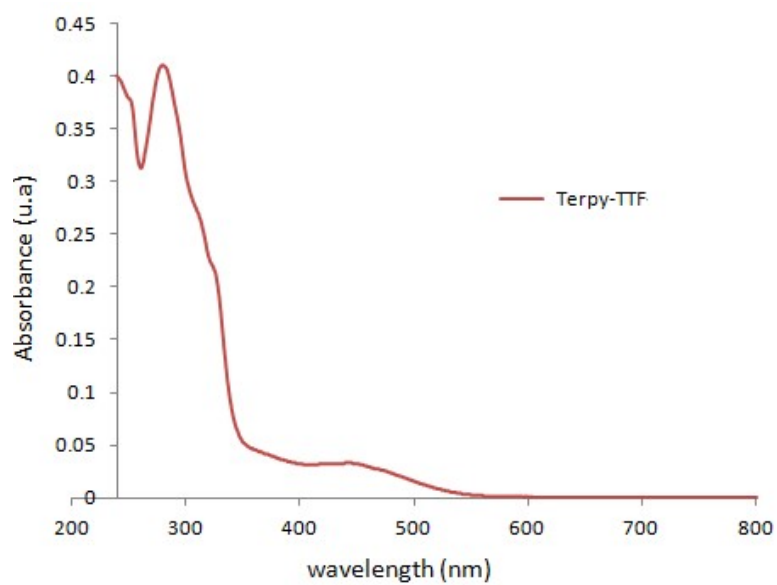

**Figure S11** : UV-Visible experiment of dyad **1** ( $10^{-5}$  M) in  $\text{CH}_2\text{Cl}_2/\text{CH}_3\text{CN}$  (1/1, v/v).

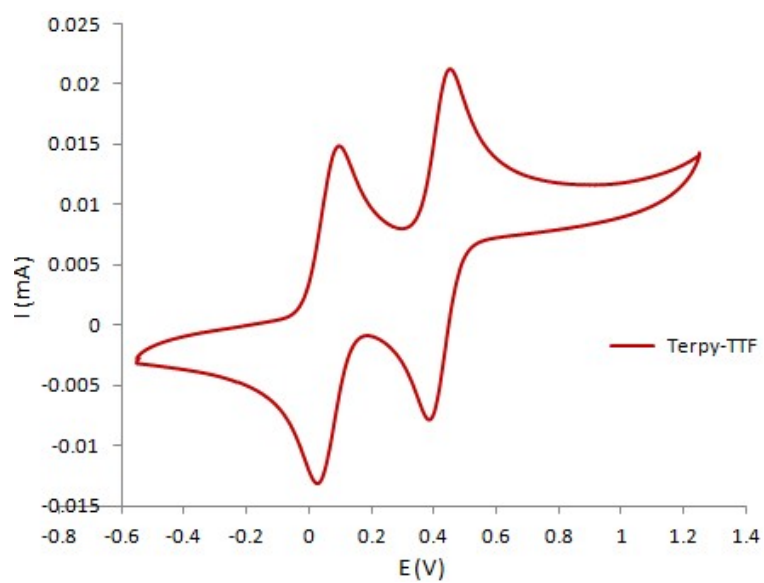

**Figure S12** : CV experiment of dyad **1** ( $10^{-3}$  M) in  $\text{CH}_2\text{Cl}_2/\text{CH}_3\text{CN}$  (1/1, v/v); 100 mV/s,  $n\text{Bu}_4\text{BF}_6$  ( $10^{-1}$  M), vs Ag/AgCl, (vs Fc/Fc<sup>+</sup>).

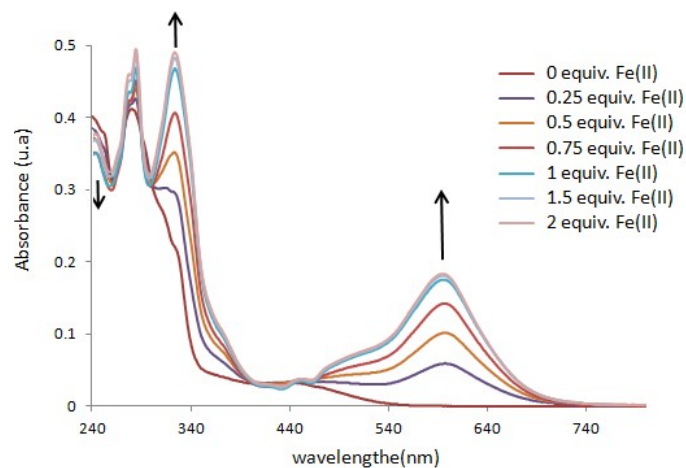

**Figure S13** : UV-Visible titration experiment of dyad **1** ( $10^{-5}$  M) in  $\text{CH}_2\text{Cl}_2/\text{CH}_3\text{CN}$  (1/1, v/v) in presence of  $\text{Fe}(\text{ClO}_4)_2$ .

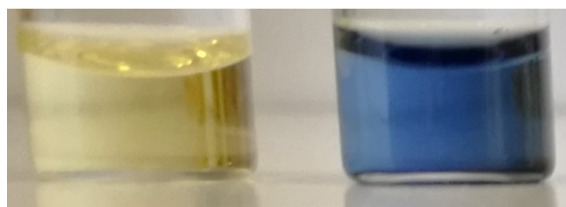

**Figure S14** : Color evolution before (left) and after (right) titration of dyad **1** ( $10^{-5}$  M) in presence of 2 equiv.  $\text{Fe}(\text{ClO}_4)_2$  in  $\text{CH}_2\text{Cl}_2/\text{CH}_3\text{CN}$  (1/1, v/v).

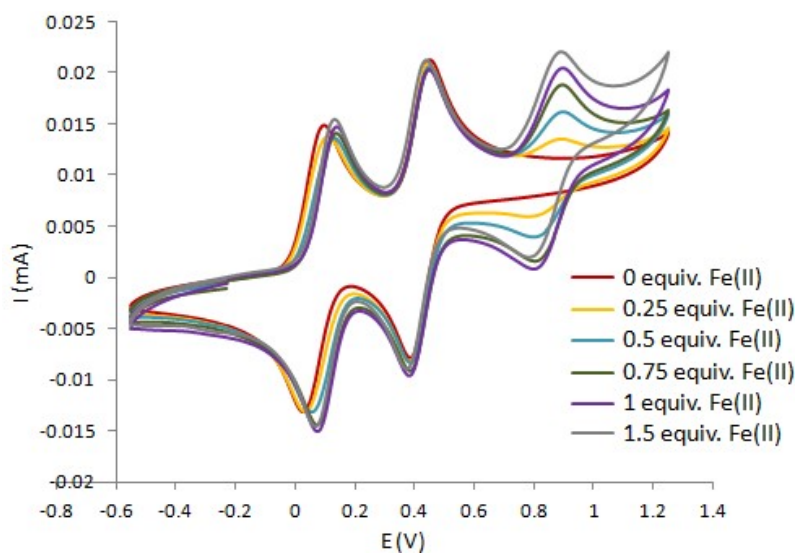

**Figure S15** : CV titration experiment of dyad **1** ( $10^{-3}$  M) in  $\text{CH}_2\text{Cl}_2/\text{CH}_3\text{CN}$  (1/1, v/v) in presence of  $\text{Fe}(\text{ClO}_4)_2$  ; 100 mV/s,  $n\text{Bu}_4\text{BF}_6$  ( $10^{-1}$  M), vs  $\text{Ag}/\text{AgCl}$ , (vs  $\text{Fc}/\text{Fc}^+$ ).

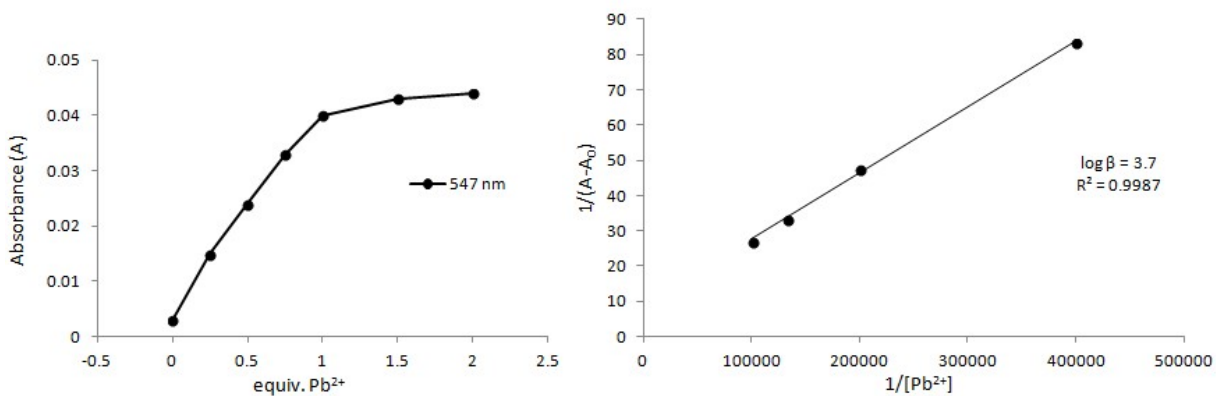

**Figure S16** : Further study of UV-Visible titration of dyad 1 ( $10^{-5}$  M) in  $CH_2Cl_2/CH_3CN$  (1/1, v/v) in presence of  $Pb(ClO_4)_2$

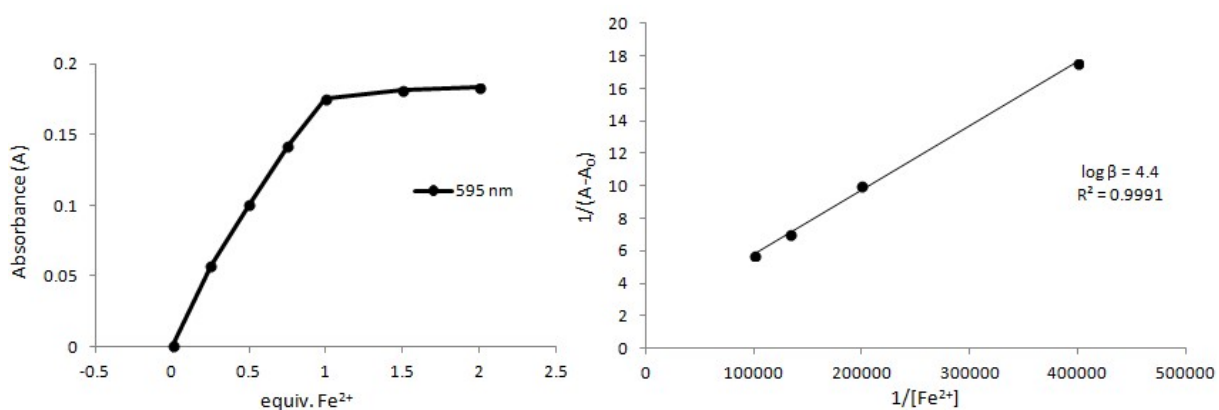

**Figure S17** : Further study of UV-Visible titration of dyad 1 ( $10^{-5}$  M) in  $CH_2Cl_2/CH_3CN$  (1/1, v/v) in presence of  $Fe(ClO_4)_2$

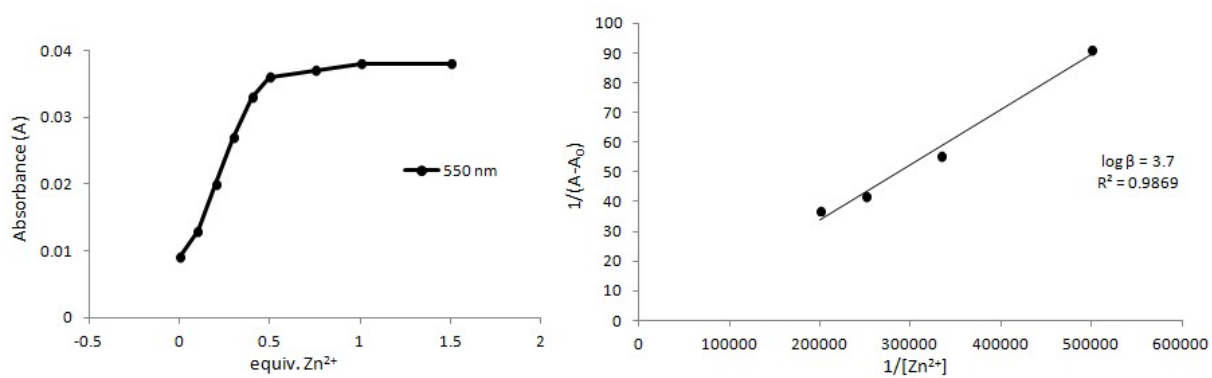

**Figure S18** : Further study of UV-Visible titration of dyad 1 ( $10^{-5}$  M) in  $CH_2Cl_2/CH_3CN$  (1/1, v/v) in presence of  $Zn(ClO_4)_2$
